# Supplementary material for: Biocementation of soil by calcite/aragonite precipitation usingPseudomonas azotoformansandCitrobacter freundiiderived enzymes
Source: Royal Society of Chemistry journal article supplement (doi:10.1039/c9ra02247c), 2019-01-01

## *Supplementary Information*

# **Biocementation of soil by calcite/aragonite precipitation using *Pseudomonas azotoformans* and *Citrobacter freundii* derived enzymes**

**Heba Abdel-Aleem<sup>1</sup>, Tarek Dishisha<sup>1</sup>, Amal Saafan<sup>2</sup>, Abdullah A. AbouKhadra<sup>3</sup> and  
Yasser Gaber<sup>1,4,\*</sup>**

<sup>1</sup>Department of Microbiology and Immunology, Faculty of Pharmacy, Beni-Suef University, 62511, Beni-Suef, Egypt

<sup>2</sup>Department of Pharmaceutical Microbiology, Faculty of Pharmacy, Menoufia university, Shebeen El-kom, Egypt

<sup>3</sup>Department of Civil Engineering, Faculty of Engineering, Beni-Suef University, 62511, Beni-Suef, Egypt

<sup>4</sup>Department of Pharmaceutics and Pharmaceutical Technology, Faculty of Pharmacy, Mutah University, Al-karak, 61710, Jordan

**\*Corresponding author:**

E-mail: [Yasser.Gaber@pharm.bsu.edu.eg](mailto:Yasser.Gaber@pharm.bsu.edu.eg)

Tel. int +20 82 216 2133 ; Fax. int +20 82 216 2133

**Supplementary Table 1: strains identified using BCL card (Gram positive spore forming bacilli)**

| Sample/test | A1 | B1 | B2 | Y1a | Y2a |                                                        |
|-------------|----|----|----|-----|-----|--------------------------------------------------------|
| BXYL        | -  | -  | -  | -   | -   | <b>BXYL</b> (betaxylosidase),                          |
| LysA        | -  | -  | -  | -   | -   | <b>LysA</b> (L- lysine arylamidase),                   |
| AspA        | -  | -  | -  | +   | -   | <b>AspA</b> (L aspartate arylamidase),                 |
| LeuA        | +  | +  | +  | +   | +   | <b>LeuA</b> (leucine arylamidase),                     |
| PheA        | -  | +  | -  | -   | -   | <b>PheA</b> (phenylalanine arylamidase),               |
| ProA        | -  | -  | -  | +   | -   | <b>ProA</b> (L-proline arylamidase),                   |
| BGAL        | -  | -  | -  | -   | -   | <b>BGAL</b> (beta galactosidase),                      |
| PyrA        | +  | +  | +  | +   | +   | <b>PyrA</b> (L-pyrrolydonyl arylamidase),              |
| AGAL        | -  | -  | -  | -   | -   | <b>AGAL</b> (alpha galactosidase),                     |
| AlaA        | -  | -  | -  | +   | -   | <b>AlaA</b> (alanine arylamidase),                     |
| TyrA        | -  | -  | -  | -   | -   | <b>TyrA</b> (tyrosine arylamidase),                    |
| BNAG        | +  | +  | +  | +   | +   | <b>BNAG</b> (beta-N-acetyl glucosamidase),             |
| APPA        | +  | +  | +  | +   | +   | <b>APPA</b> (Ala-Phe-Pro arylamidase),                 |
| CDEX        | -  | -  | +  | -   | -   | <b>CDEX</b> (cyclodextrin),                            |
| Dgal        | +  | -  | -  | -   | -   | <b>dGAL</b> (D-galactose),                             |
| GLYG        | +  | -  | -  | -   | -   | <b>GLYG</b> (Glcogen),                                 |
| INO         | -  | -  | -  | -   | -   | <b>INO</b> (myo-inositol),                             |
| MdG         | -  | -  | -  | -   | -   | <b>MdG</b> (Methyl-A-D-Glucopyranoside acidification), |
| ELLM        | -  | -  | -  | -   | -   | <b>ELLM</b> (Ellman),                                  |
| MdX         | -  | -  | -  | -   | -   | <b>MdX</b> (Methyl-D-Xyloside),                        |
| AMAN        | -  | -  | -  | -   | -   | <b>AMAN</b> (Alpha-Mannosidase),                       |
| MTE         | +  | +  | +  | -   | +   | <b>MTE</b> (Maltotriose),                              |
| GlyA        | -  | -  | -  | +   | -   | <b>GlyA</b> (Glycine Arylamidase),                     |
| dMAN        | -  | -  | +  | -   | -   | <b>dMAN</b> (D-Mannitol),                              |
| dMNE        | +  | +  | +  | -   | +   | <b>dMNE</b> (D-mannose),                               |
| dMLZ        | -  | -  | +  | -   | -   | <b>dMLZ</b> (D-Melezitose),                            |
| NAG         | +  | +  | +  | -   | +   | <b>NAG</b> (N-Acetyl-D-Glucosamine),                   |
| PLE         | -  | -  | -  | -   | -   | <b>PLE</b> (Palatinose),                               |
| IRHA        | -  | -  | -  | -   | -   | <b>IRHA</b> (L-Rhamnose),                              |
| BGLU        | -  | -  | +  | -   | -   | <b>BGLU</b> (Beta-Glucosidase),                        |
| BMAN        | -  | -  | -  | -   | -   | <b>BMAN</b> (Beta-Mannosidase),                        |
| PHC         | -  | -  | -  | -   | -   | <b>PHC</b> (Phosphoryl Choline),                       |
| PVATE       | +  | +  | +  | -   | +   | <b>PVATE</b> (Pyruvate),                               |
| AGLU        | -  | -  | -  | -   | -   | <b>AGLU</b> (Alpha- Glucosidase),                      |
| dTAG        | -  | -  | -  | -   | -   | <b>dTAG</b> (D-Tagatose),                              |
| dTRE        | +  | +  | +  | -   | +   | <b>dTRE</b> (D-Trehalose),                             |
| INU         | -  | -  | -  | -   | -   | <b>INU</b> (Inulin),                                   |
| dGLU        | +  | +  | +  | -   | +   | <b>dGLU</b> (D-Glucose),                               |
| dRIB        | +  | +  | +  | -   | +   | <b>dRIB</b> (D-Ribose),                                |
| PSCNa       | -  | -  | -  | -   | -   | <b>PSCNa</b> (Putrescine assimilation),                |
| NaCl 6.5%   | +  | +  | +  | -   | +   | <b>NaCl 6.5%</b> (growth in 6.5% NaCl),                |
| KAN         | -  | -  | +  | +   | -   | <b>KAN</b> (Kanamycin Resistance),                     |
| OLD         | -  | -  | -  | +   | -   | <b>OLD</b> (Oleandomycin Resistance),                  |
| ESC         | +  | +  | +  | -   | +   | <b>ESC</b> (Esculin hydrolysis),                       |
| TTZ         | +  | +  | +  | +   | -   | <b>TTZ</b> (Tetrazolium red),                          |
| POLYB-R     | +  | +  | +  | +   | +   | <b>POLYB-R</b> (Polymixin B resistance)                |

**Supplementary Table 2: strains identified using GN card (Gram negative fermenting and non-fermenting bacilli)**

| Sample/test      | C | S2a | Y1b | Y2b | Y3a |                                                      |
|------------------|---|-----|-----|-----|-----|------------------------------------------------------|
| AAPA             | + | +   | -   | -   | -   | <b>APPA</b> (Ala-Phe-Pro-Arylamidase),               |
| ADO              | - | -   | -   | -   | -   | <b>ADO</b> (Adonitol),                               |
| PyrA             | + | +   | -   | +   | +   | <b>PyrA</b> (L-Pyrrolydonyl-Arylamidase),            |
| IRAL             | - | -   | -   | -   | -   | <b>IARL</b> (L-Arabitol),                            |
| dCEL             | - | -   | -   | -   | -   | <b>dCEL</b> (D-Cellobiose),                          |
| BGAL             | - | -   | -   | +   | +   | <b>BGAL</b> (Beta-Galactosidase),                    |
| H <sub>2</sub> S | - | -   | -   | +   | +   | <b>H<sub>2</sub>S</b> (H <sub>2</sub> S Production), |
| BNAG             | + | -   | +   | -   | -   | <b>BNAG</b> (Beta-N-Acetyl-Glucosaminidase),         |
| AGLTp            | + | -   | -   | -   | -   | <b>AGLTp</b> (Glutamyl Arylamidase pNA),             |
| dGLU             | - | -   | -   | +   | +   | <b>dGLU</b> (D-Glucose),                             |
| GGT              | - | -   | -   | -   | -   | <b>GGT</b> (Gamma-Glutamyl-Transferase),             |
| OFF              | - | -   | -   | -   | -   | <b>OFF</b> (Fermentation/Glucose),                   |
| BGLU             | - | -   | -   | -   | -   | <b>BGLU</b> (Beta-Glucosidase),                      |
| dMAL             | - | -   | -   | +   | +   | <b>dMAL</b> (D-Maltose),                             |
| dMAN             | - | -   | -   | +   | +   | <b>dMAN</b> (D-Mannitol),                            |
| dMNE             | - | -   | -   | +   | +   | <b>dMNE</b> (D-Mannose)                              |
| BXYL             | - | -   | -   | -   | -   | <b>BXYL</b> (Beta-Xylosidase),                       |
| BAIap            | - | -   | -   | -   | -   | <b>BAIap</b> (Beta-Alanine arylamidase pNA),         |
| ProA             | - | +   | +   | -   | -   | <b>ProA</b> (L-Proline Arylamidase),                 |
| LIP              | - | -   | -   | -   | -   | <b>LIP</b> (Lipase),                                 |
| PLE              | + | -   | -   | -   | -   | <b>PLE</b> (Palatinose),                             |
| TyrA             | - | -   | -   | +   | +   | <b>TyrA</b> (Tyrosine Arylamidase),                  |
| URE              | + | +   | -   | -   | -   | <b>URE</b> (Urease),                                 |
| dSOR             | - | -   | -   | +   | +   | <b>dSOR</b> (D-Sorbitol),                            |
| SAC              | - | -   | -   | +   | +   | <b>SAC</b> (Saccharose/sucrose),                     |
| dTAG             | + | -   | -   | +   | +   | <b>dTAG</b> (D-Tagatose),                            |
| dTRE             | - | -   | -   | +   | +   | <b>dTRE</b> (D-Trehalose),                           |
| CIT              | - | -   | -   | +   | +   | <b>CIT</b> (Citrate (sodium)),                       |
| MNT              | - | -   | -   | -   | -   | <b>MNT</b> (Malonate),                               |
| 5KG              | - | -   | -   | +   | +   | <b>5KG</b> (5-Keto-D-Gluconate),                     |
| ILTAK            | - | -   | -   | -   | -   | <b>ILATk</b> (L-Lactate alkalinisation),             |
| AGLU             | - | -   | +   | -   | -   | <b>AGLU</b> (Alpha-Glucosidase),                     |
| SUCT             | + | -   | -   | +   | +   | <b>SUCT</b> (Succinate alkalinisation),              |
| NAGA             | - | -   | -   | -   | -   | <b>NAGA</b> (Beta-Acetyl-Galactosaminidase),         |
| AGAL             | - | -   | -   | +   | +   | <b>AGAL</b> (Alpha-Galactosidase),                   |
| PHOS             | + | -   | -   | -   | -   | <b>PHOS</b> (phosphatase),                           |
| GlyA             | - | -   | -   | -   | -   | <b>GlyA</b> (Glycine Arylamidase),                   |
| ODC              | - | -   | -   | -   | -   | <b>ODC</b> (Ornithine Decarboxylase),                |
| LDC              | - | -   | -   | -   | -   | <b>LDC</b> (Lysine decarboxylase),                   |
| IHISa            | - | -   | -   | -   | -   | <b>IHISa</b> (L-Histidine assimilation),             |
| CMT              | - | +   | -   | +   | +   | <b>GMT</b> (Coumrate),                               |
| BGUR             | - | -   | -   | -   | -   | <b>BGUR</b> (Beta-Glucoronidase),                    |
| O129R            | - | -   | +   | +   | +   | <b>O129R</b> (O/129 Resistance (comp.vibrio)),       |
| GGAA             | - | -   | -   | -   | -   | <b>GGAA</b> (Glu-Gly-Arg-Arylamidase),               |
| IMLTa            | - | -   | -   | -   | -   | <b>IMLTa</b> (L-Malate assimilation),                |
| ELLM             | + | -   | -   | -   | -   | <b>ELLM</b> (Ellman),                                |
| ILATa            | - | -   | -   | +   | +   | <b>ILATa</b> (L-Lactate assimilation).               |

**Supplementary Table 3: strains identified using GP (Gram positive cocci and non-spore forming bacilli)**

| Sample/test | S2b | Po <sub>4</sub> | Fe | Y3b |                                                      |
|-------------|-----|-----------------|----|-----|------------------------------------------------------|
| AMY         | -   | -               | -  | -   | <b>AMY</b> (D-Amygdaline),                           |
| PIPLC       | -   | -               | -  | -   | <b>PIPLC</b> (Phosphatidylinositol phospholipase C), |
| dXYL        | +   | -               | -  | -   | <b>dXYL</b> (D-Xylose),                              |
| ADH1        | +   | -               | -  | -   | <b>ADH1</b> (Arginine Dihydrolase 1),                |
| BGAL        | +   | -               | -  | +   | <b>BGAL</b> (Beta-Galactosidase),                    |
| AGLU        | -   | -               | -  | -   | <b>AGLU</b> (Alpha-Glucosidase),                     |
| APPA        | -   | -               | -  | -   | <b>APPA</b> (Ala-Phe-Pro-Arylamidase),               |
| CDEX        | -   | -               | -  | -   | <b>CDEX</b> (Cyclodextrine),                         |
| AspA        | -   | -               | -  | -   | <b>AspA</b> (L-Aspartate Arylamidase),               |
| BGAR        | -   | -               | -  | -   | <b>BGAR</b> (Beta Galactopyranosidase),              |
| AMAN        | -   | -               | -  | -   | <b>AMAN</b> (Alpha-Mannosidase),                     |
| PHOS        | -   | -               | -  | -   | <b>PHOS</b> (Phosphatase),                           |
| LeuA        | +   | -               | -  | -   | <b>LeuA</b> (Leucine Arylamidase),                   |
| ProA        | -   | -               | -  | -   | <b>ProA</b> (L-Proline Arylamidase),                 |
| BGURr       | -   | -               | -  | -   | <b>BGURr</b> (Beta glucuronidase),                   |
| AGAL        | -   | -               | -  | +   | <b>AGAL</b> (Alpha Galactosidase),                   |
| PyrA        | +   | -               | -  | -   | <b>PyrA</b> (L-Pyrrolidonyl-Arylamidase),            |
| BGUR        | -   | -               | -  | -   | <b>BGUR</b> (Beta-glucuronidase),                    |
| AlaA        | +   | -               | -  | -   | <b>AlaA</b> (Alanine Arylamidase),                   |
| TyrA        | -   | -               | -  | -   | <b>TyrA</b> (Tyrosine Arylamidase),                  |
| dSOR        | -   | -               | -  | -   | <b>dSOR</b> (D-Sorbitol),                            |
| URE         | -   | -               | -  | -   | <b>URE</b> (Urease),                                 |
| POLYB       | +   | -               | -  | -   | <b>POLYB</b> (Polymixin B resistance),               |
| dGAL        | +   | -               | -  | +   | <b>dGAL</b> (D-Galactose),                           |
| dRIB        | +   | +               | +  | -   | <b>dRIB</b> (D-Ribose),                              |
| ILATk       | +   | -               | -  | -   | <b>ILATk</b> (L-Lactate alkalization),               |
| LAC         | +   | -               | -  | -   | <b>LAC</b> (Lactose),                                |
| NAG         | +   | +               | +  | -   | <b>NAG</b> (N-Acetyl-D-glucosamine),                 |
| dMAL        | +   | +               | +  | +   | <b>dMAL</b> (D-Maltose),                             |
| BACI        | +   | +               | +  | -   | <b>BACI</b> (Bacitracin resistance),                 |
| NOVO        | +   | -               | -  | -   | <b>NOVO</b> (Novobiocin resistance),                 |
| NC6.5       | +   | -               | -  | -   | <b>NC6.5</b> (Growth in 6.5% NaCl),                  |
| dMAN        | +   | -               | -  | +   | <b>dMAN</b> (D-Mannitol),                            |
| dMNE        | +   | -               | -  | -   | <b>dMNE</b> (D-Mannose),                             |
| MBdG        | +   | -               | -  | +   | <b>MBdG</b> (Methyl-B-D-g-Glucopyranoside),          |
| PUL         | -   | -               | -  | -   | <b>PUL</b> (Pullulan),                               |
| dRAF        | -   | +               | +  | +   | <b>dRAF</b> (D-Raffinose),                           |
| O129R       | +   | +               | +  | +   | <b>O129R</b> (O/129 Resistance (comp vibrio)),       |
| SAL         | +   | +               | +  | -   | <b>SAL</b> (Salicin),                                |
| SAC         | -   | +               | +  | +   | <b>SAC</b> (Saccharose/sucrose),                     |
| dTRE        | +   | +               | +  | +   | <b>dTRE</b> (D-Trehalose),                           |
| ADH2s       | -   | -               | -  | -   | <b>ADH2s</b> (Arginine Dihydrolase 2),               |
| OPTO        | +   | -               | -  | +   | <b>OPTO</b> (Optochin resistance).                   |

**Supplementary Table 4. The standard XRD data of CaCO<sub>3</sub> with calcite (JCPDS no. 47-1743), and aragonite (JCPDS no. 41-1475).**

**Reference calcite**

| No. | h | k | l   | d [Å]   | 2Theta[deg] | I [%] |
|-----|---|---|-----|---------|-------------|-------|
| 1   | 0 | 1 | 2   | 3.85480 | 23.054      | 8.9   |
| 2   | 1 | 0 | 4   | 3.03550 | 29.401      | 100.0 |
| 3   | 0 | 0 | 6   | 2.84350 | 31.435      | 2.2   |
| 4   | 1 | 1 | 0   | 2.49480 | 35.969      | 14.7  |
| 5   | 1 | 1 | -3  | 2.28460 | 39.409      | 20.2  |
| 6   | 2 | 0 | 2   | 2.09440 | 43.159      | 16.1  |
| 7   | 0 | 2 | 4   | 1.92740 | 47.114      | 7.0   |
| 8   | 0 | 1 | 8   | 1.91240 | 47.506      | 21.7  |
| 9   | 1 | 1 | -6  | 1.87530 | 48.505      | 23.2  |
| 10  | 1 | 2 | -1  | 1.62580 | 56.562      | 4.2   |
| 11  | 1 | 2 | 2   | 1.60410 | 57.398      | 11.8  |
| 12  | 1 | 0 | 10  | 1.58690 | 58.079      | 1.2   |
| 13  | 1 | 2 | -4  | 1.52520 | 60.669      | 6.6   |
| 14  | 2 | 0 | 8   | 1.51780 | 60.996      | 3.0   |
| 15  | 1 | 1 | -9  | 1.50940 | 61.372      | 3.6   |
| 16  | 2 | 1 | -5  | 1.47320 | 63.051      | 2.7   |
| 17  | 3 | 0 | 0   | 1.44040 | 64.658      | 8.4   |
| 18  | 0 | 0 | 12  | 1.42180 | 65.610      | 4.8   |
| 19  | 1 | 2 | -7  | 1.35680 | 69.185      | 1.9   |
| 20  | 0 | 2 | 10  | 1.33900 | 70.238      | 3.1   |
| 21  | 2 | 1 | -8  | 1.29670 | 72.889      | 3.7   |
| 22  | 0 | 3 | 6   | 1.28490 | 73.668      | 0.8   |
| 23  | 2 | 2 | 0   | 1.24740 | 76.271      | 1.5   |
| 24  | 1 | 1 | -12 | 1.23520 | 77.162      | 2.8   |
| 25  | 1 | 3 | -2  | 1.18680 | 80.941      | 0.8   |
| 26  | 1 | 2 | -10 | 1.17980 | 81.522      | 3.7   |
| 27  | 0 | 1 | 14  | 1.17290 | 82.105      | 0.5   |
| 28  | 1 | 3 | 4   | 1.15380 | 83.767      | 6.8   |
| 29  | 2 | 2 | -6  | 1.14230 | 84.806      | 3.5   |
| 30  | 2 | 1 | -11 | 1.12470 | 86.455      | 0.9   |
| 31  | 2 | 0 | 14  | 1.06140 | 93.061      | 1.4   |
| 32  | 4 | 0 | 4   | 1.04720 | 94.713      | 4.9   |
| 33  | 1 | 3 | -8  | 1.04480 | 94.999      | 5.3   |
| 34  | 1 | 0 | 16  | 1.03520 | 96.165      | 2.5   |
| 35  | 1 | 1 | -15 | 1.03490 | 96.202      | 0.8   |
| 36  | 1 | 2 | -13 | 1.02300 | 97.699      | 0.6   |
| 37  | 3 | 0 | 12  | 1.01180 | 99.161      | 5.4   |
| 38  | 2 | 3 | -1  | 0.98970 | 102.213     | 0.7   |
| 39  | 3 | 2 | -2  | 0.98470 | 102.938     | 2.7   |
| 40  | 3 | 1 | -10 | 0.98070 | 103.526     | 0.6   |
| 41  | 2 | 1 | -14 | 0.97670 | 104.124     | 2.4   |
| 42  | 2 | 3 | -4  | 0.96560 | 105.830     | 1.8   |
| 43  | 0 | 4 | 8   | 0.96370 | 106.130     | 4.4   |
| 44  | 0 | 2 | 16  | 0.95620 | 107.334     | 1.0   |
| 45  | 3 | 2 | -5  | 0.95200 | 108.024     | 0.6   |
| 46  | 4 | 1 | 0   | 0.94290 | 109.561     | 4.2   |
| 47  | 2 | 2 | -12 | 0.93770 | 110.466     | 1.9   |
| 48  | 2 | 3 | -7  | 0.91830 | 114.034     | 0.6   |
| 49  | 3 | 2 | -8  | 0.89900 | 117.927     | 1.9   |
| 50  | 4 | 1 | -6  | 0.89500 | 118.784     | 1.8   |
| 51  | 1 | 2 | -16 | 0.89290 | 119.241     | 2.2   |
| 52  | 1 | 1 | -18 | 0.88600 | 120.781     | 2.8   |
| 53  | 5 | 0 | 2   | 0.85980 | 127.250     | 0.6   |
| 54  | 2 | 3 | -10 | 0.85710 | 127.983     | 3.2   |
| 55  | 2 | 1 | -17 | 0.85510 | 128.535     | 0.6   |
| 56  | 1 | 3 | -14 | 0.85450 | 128.702     | 0.8   |
| 57  | 0 | 5 | 4   | 0.84700 | 130.858     | 2.5   |
| 58  | 0 | 1 | 20  | 0.83690 | 133.975     | 3.1   |
| 59  | 3 | 2 | -11 | 0.83530 | 134.495     | 0.8   |
| 60  | 3 | 3 | 0   | 0.83160 | 135.726     | 1.6   |

### Reference aragonite

| No. | h | k | l  | d [Å]   | 2Theta[deg] | I [%] |
|-----|---|---|----|---------|-------------|-------|
| 1   | 0 | 0 | 4  | 4.22600 | 21.005      | 25.0  |
| 2   | 1 | 1 | 0  | 3.57300 | 24.900      | 60.0  |
| 3   | 1 | 1 | 2  | 3.29400 | 27.048      | 100.0 |
| 4   | 1 | 1 | 4  | 2.73000 | 32.778      | 90.0  |
| 5   | 2 | 1 | 1  | 2.31800 | 38.818      | 5.0   |
| 6   | 2 | 0 | 5  | 2.28200 | 39.456      | 2.0   |
| 7   | 1 | 1 | 6  | 2.21200 | 40.759      | 5.0   |
| 8   | 2 | 1 | 3  | 2.16100 | 41.765      | 2.0   |
| 9   | 0 | 0 | 8  | 2.11300 | 42.760      | 20.0  |
| 10  | 3 | 0 | 0  | 2.06300 | 43.849      | 60.0  |
| 11  | 3 | 0 | 4  | 1.85400 | 49.099      | 30.0  |
| 12  | 1 | 1 | 8  | 1.82000 | 50.079      | 70.0  |
| 13  | 2 | 2 | 0  | 1.78800 | 51.039      | 5.0   |
| 14  | 2 | 2 | 2  | 1.75000 | 52.230      | 2.0   |
| 15  | 2 | 2 | 4  | 1.64600 | 55.807      | 30.0  |
| 16  | 4 | 0 | 1  | 1.54400 | 59.854      | 5.0   |
| 17  | 2 | 2 | 6  | 1.51000 | 61.345      | 1.0   |
| 18  | 3 | 0 | 8  | 1.47700 | 62.870      | 10.0  |
| 19  | 0 | 0 | 12 | 1.41300 | 66.070      | 2.0   |
| 20  | 2 | 2 | 8  | 1.36600 | 68.653      | 10.0  |
| 21  | 4 | 1 | 0  | 1.35100 | 69.524      | 1.0   |
| 22  | 4 | 1 | 2  | 1.33500 | 70.480      | 1.0   |
| 23  | 1 | 1 | 12 | 1.31100 | 71.969      | 20.0  |
| 24  | 4 | 1 | 4  | 1.28600 | 73.595      | 20.0  |
| 25  | 3 | 3 | 0  | 1.19000 | 80.678      | 5.0   |
| 26  | 3 | 0 | 12 | 1.16300 | 82.957      | 5.0   |
| 27  | 3 | 3 | 4  | 1.14600 | 84.469      | 10.0  |
| 28  | 4 | 1 | 8  | 1.13800 | 85.202      | 10.0  |
| 29  | 2 | 2 | 12 | 1.10900 | 87.989      | 10.0  |
| 30  | 0 | 0 | 16 | 1.05700 | 93.565      | 5.0   |
| 31  | 6 | 0 | 0  | 1.03200 | 96.562      | 1.0   |
| 32  | 1 | 1 | 16 | 1.01400 | 98.869      | 5.0   |
| 33  | 6 | 0 | 4  | 1.00200 | 100.486     | 1.0   |
| 34  | 5 | 2 | 0  | 0.99090 | 102.042     | 1.0   |
| 35  | 4 | 1 | 12 | 0.97490 | 104.396     | 5.0   |
| 36  | 5 | 2 | 4  | 0.96490 | 105.940     | 2.0   |
| 37  | 3 | 0 | 16 | 0.94100 | 109.889     | 10.0  |
| 38  | 3 | 3 | 12 | 0.91010 | 115.642     | 2.0   |
| 39  | 2 | 2 | 16 | 0.91010 | 115.642     | 2.0   |

**Supplementary Fig. 1.**

Supplementary Fig. 1A: Optimum pH curve for (a) A1 strain, (b) B1 strain, (c) B2 strain, (d) C strain, (e) PO<sub>4</sub> strain, (f) S1a strain, (g) S1b strain, (h) S2a strain, (i) S2b strain, (j) Y1a strain, (k) Y1b strain, (l) Y2a strain, (m) Y2b strain, (n) Y3a strain, (o) Y3b strain.

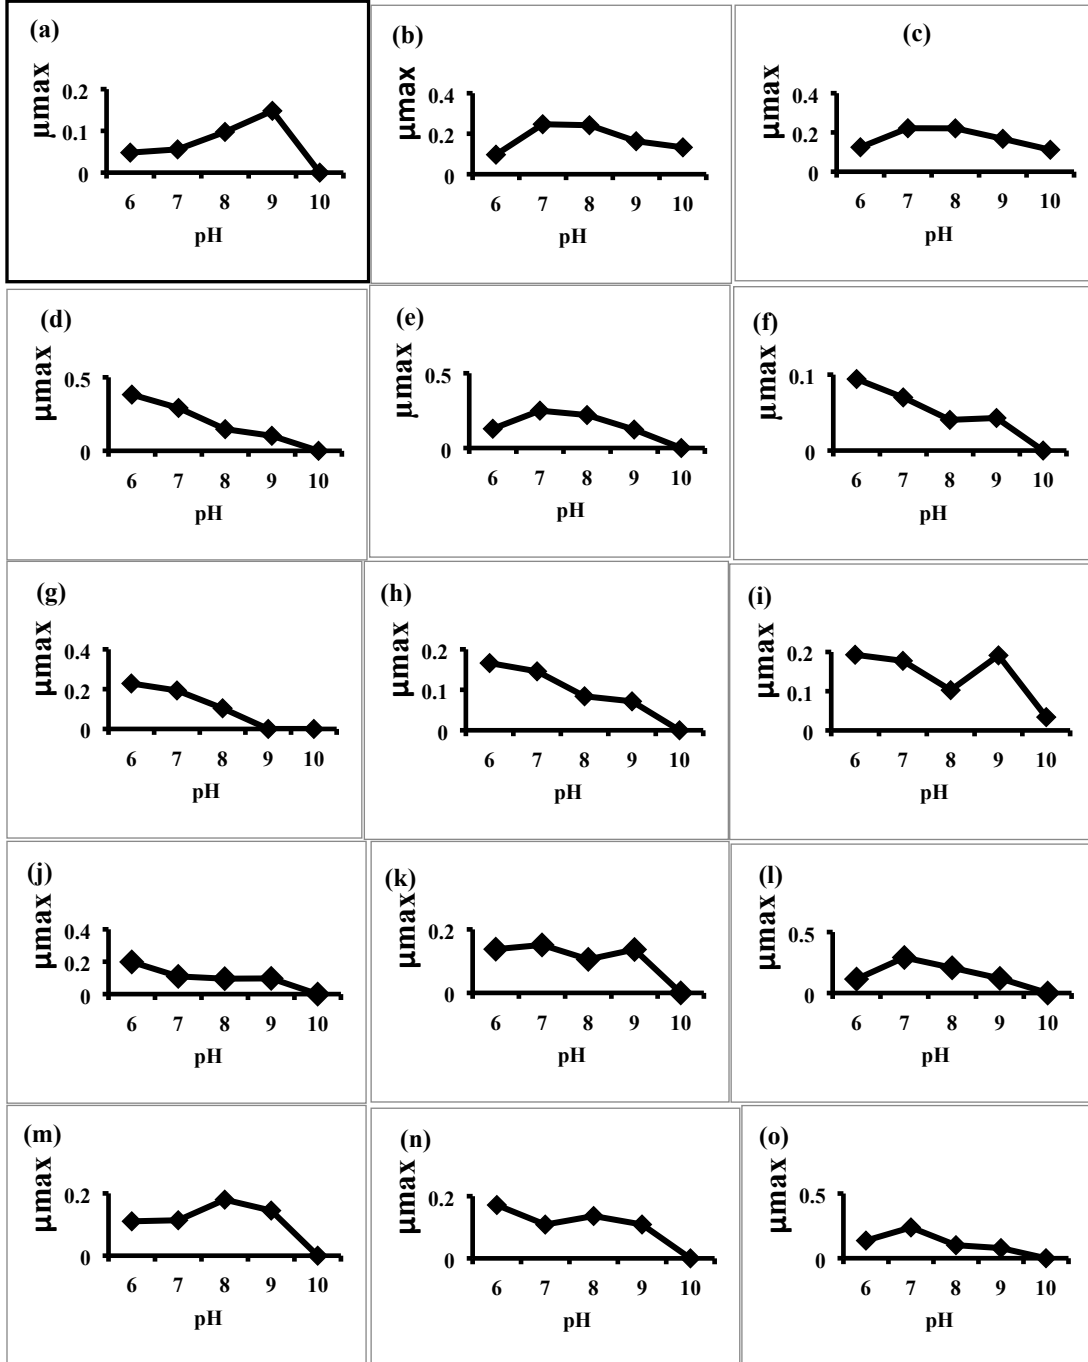

Supplementary Fig. 1B. Growth curves of the different isolates at different pH values.

pH 10

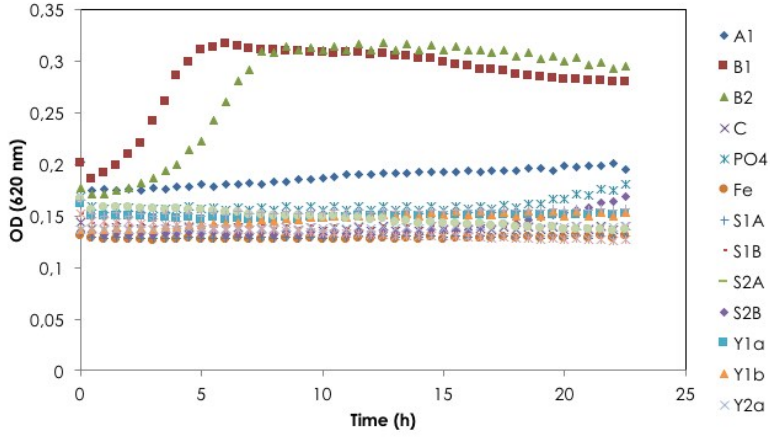

pH 9

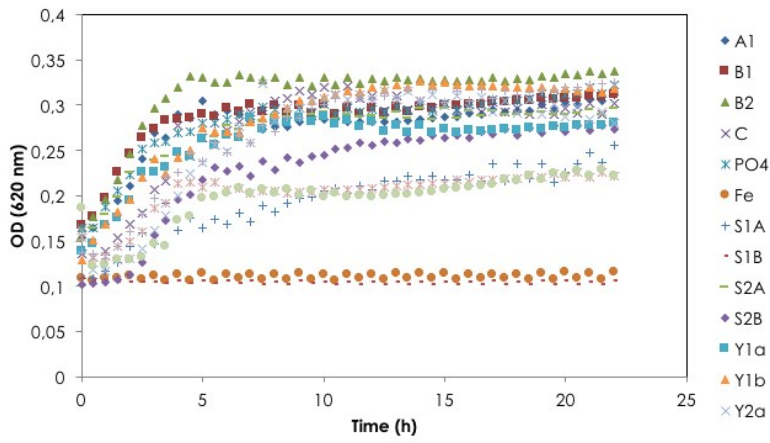

pH 8

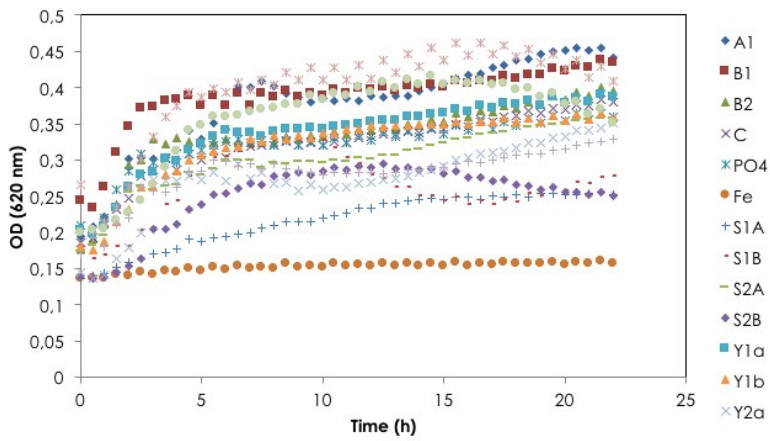



pH 7

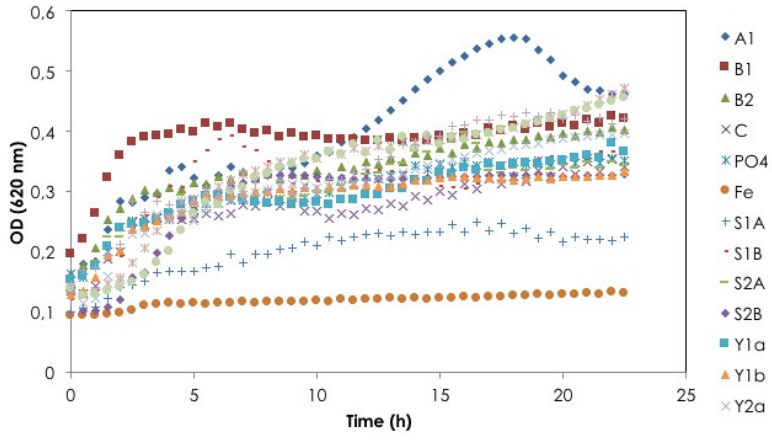

pH 6

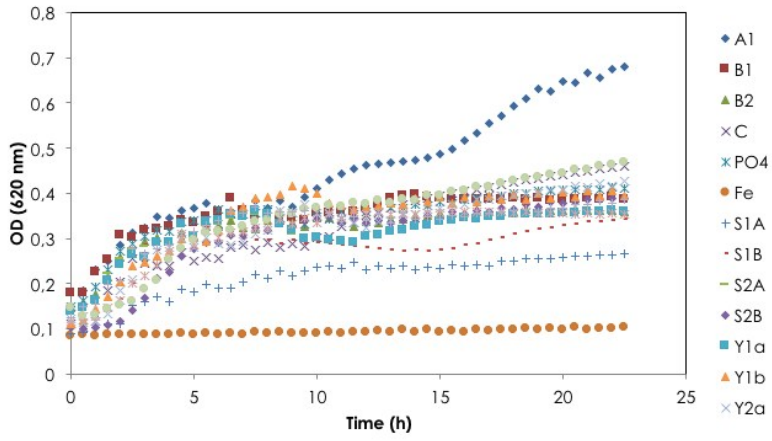

**Supplementary Fig. 2.** (A) Negative control, (B) calcium carbonate crystal formation after immediate reaction of samples' supernatant and cementation solution, (C) Calcite precipitate after one week. Tubes order: Left (Isolate C), Middle (Isolate Y2b), Right (Reference strain DSM 33).

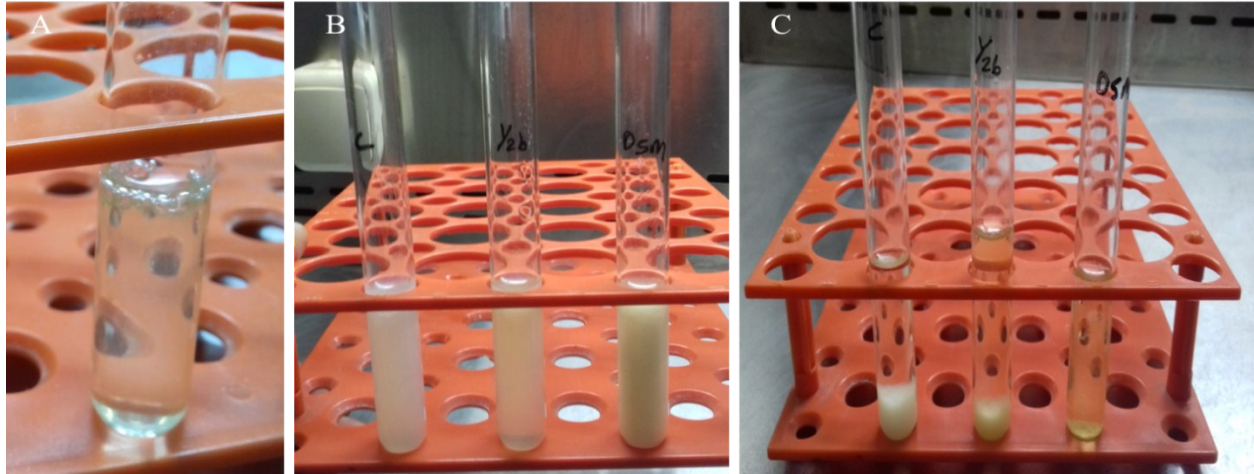

Supplementary Fig. 3. Particle size distribution curve

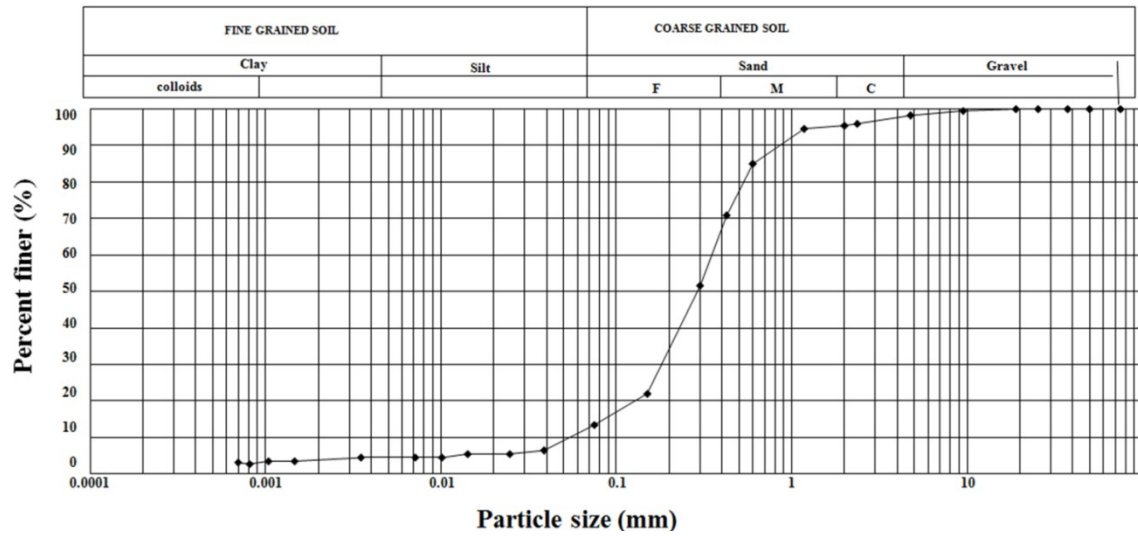

**Supplementary Fig. 4.** The standard XRD data of  $\text{CaCO}_3$  with calcite (JCPDS no. 47-1743), vaterite (JCPDS no. 33-0268) and aragonite (JCPDS no. 41-1475)

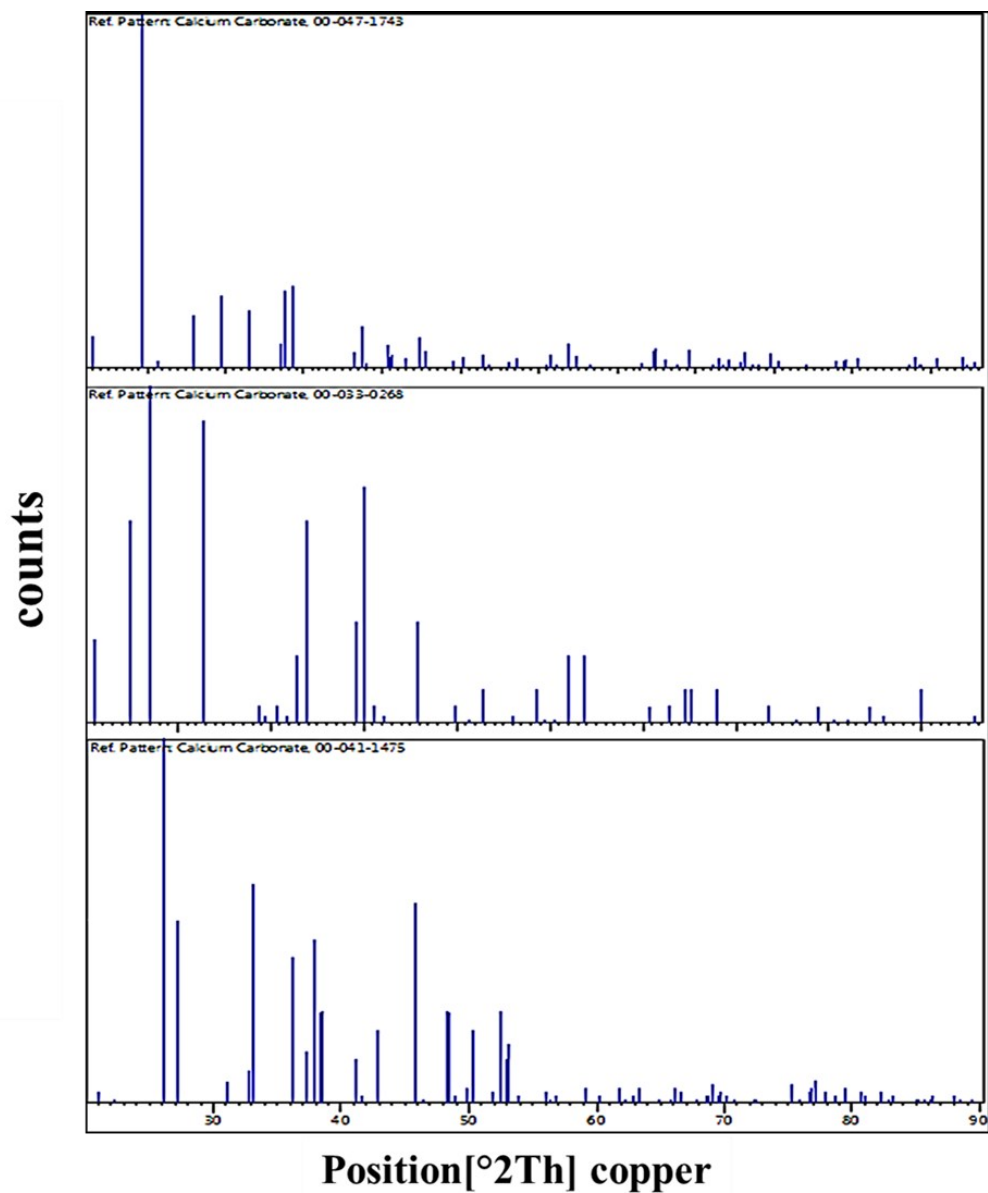

Supplement: c9ra02247c1.pdf [file c9ra02247c1.pdf]
